1 Normalisation of SARS-CoV-2 concentrations in wastewater:  
2 the use of flow, conductivity and CrAssphage.

3 Authors and their affiliations

4 Jeroen Langeveld\*<sup>1,2</sup>, Remy Schilperoort<sup>2</sup>, Leo Heijnen<sup>3</sup>, Goffe Elsinga<sup>3</sup>, Claudia E.M.  
5 Schapendonk<sup>4</sup>, Ewout Fanoy<sup>7</sup>, Evelien I.T. de Schepper<sup>5</sup>, Marion P. G. Koopmans<sup>4</sup>, Miranda  
6 de Graaf<sup>4</sup>, Gertjan Medema<sup>1,3,6</sup>

7 <sup>1</sup> Sanitary Engineering, Delft University of Technology, Stevinweg 1 2628CN Delft, The  
8 Netherlands,

9 <sup>2</sup> Partners4UrbanWater, Graafseweg 274, 6532 ZV Nijmegen, The Netherlands

10 <sup>3</sup> KWR Water Research Institute, Groningenhaven 7, 3433PE Nieuwegein, The Netherlands

11 <sup>4</sup> Department of Viroscience, Erasmus University Medical Center, Dr. Molewaterplein 40,  
12 3015 GD Rotterdam, The Netherlands

13 <sup>5</sup> Department of General Practice, Erasmus University Medical Center, Dr. Molewaterplein  
14 40, 3015 GD Rotterdam, The Netherlands

15 <sup>6</sup> Natural resources, Michigan State University, 1405 S Harrison Rd, East-Lansing, 48823  
16 Michigan, USA

17 <sup>7</sup> GGD Department public health, municipality Rotterdam, Schiedamsedijk 95, 3000 LP  
18 Rotterdam, the Netherlands

19 \*Corresponding author:

20 Jeroen Langeveld: [jeroen.langeveld@urbanwater.nl](mailto:jeroen.langeveld@urbanwater.nl)

21

22

23

## 24 Abstract

25 Over the course of the COVID-19 pandemic in 2020-2021, monitoring of SARS-CoV-2 RNA  
26 in wastewater has rapidly evolved into a supplementary surveillance instrument for public  
27 health. Short term trends (2 weeks) are used as a basis for policy and decision making on  
28 measures for dealing with the pandemic. Normalization is required to account for the varying  
29 dilution rates of the domestic wastewater, that contains the shedded virus RNA. The dilution  
30 rate varies due to runoff, industrial discharges and extraneous waters. Three normalization  
31 methods using flow, conductivity and CrAssphage, have been investigated on 9 monitoring  
32 locations between Sep 2020 and Aug 2021, rendering 1071 24-hour flow-proportional  
33 samples. In addition, 221 stool samples have been analyzed to determine the daily  
34 CrAssphage load per person. Results show that flow normalization supported by a quality  
35 check using conductivity monitoring is the advocated normalization method in case flow  
36 monitoring is or can be made available. Although CrAssphage shedding rates per person  
37 vary greatly, the CrAssphage loads were very consistent over time and space and direct  
38 CrAssphage based normalization can be applied reliably for populations of 5600 and above.

## 39 Keywords

40 Sewage surveillance, COVID-19, wastewater-based epidemiology, public health,  
41 normalisation

42

## 43 1. Introduction

44 Over the course of the COVID-19 pandemic in 2020-2021, monitoring of SARS-CoV-2 RNA  
45 in wastewater has rapidly evolved into a supplementary surveillance instrument for public  
46 health. (Lodder and de Roda Husman 2020, Medema et al. 2020b, Kirby et al., 2021). It is  
47 currently used in many countries ([COVIDPoops19 Dashboard | covid19wbec.org](#)) at different  
48 scales, from national surveillance at all ([Virus particles in wastewater | Coronavirus](#)

49 [Dashboard | Government.nl](#)) or selected wastewater treatment plants ([Szennyvizekben mért](#)  
50 [SARS-CoV-2 vírus koncentrációja \(gov.hu\)](#); [Koronaviruksen jätevesiseurannan viikkoraportti](#)  
51 [\(thl.fi\)](#); [Données ouvertes - Réseau OBEPINE \(reseau-obepine.fr\)](#); [Coronastep | Luxembourg](#)  
52 [Institute of Science and Technology \(list.lu\)](#); [SARS-CoV-2 in Wastewater \(sensors-](#)  
53 [eawag.ch\)](#)) to regional (Wolfe et al., 2021; Ai et al., 2021; [Sarsaigua \(icra.cat\)](#)), (sub) city level  
54 (Rasero et al., 2021; Yaniv et al., 2021) and building level (Davo et al., 2021; Sweetapple et  
55 al., 2021; Betancourt et al., 2021). The concentration of SARS-CoV-2 RNA in wastewater  
56 has shown to reflect and even precede the trends of the newly reported cases or COVID-19  
57 hospitalizations (Medema et al. 2020a; Prado, Fumian et al. 2021; Ho et al., 2021). In  
58 situations with low COVID-19 prevalence, wastewater surveillance is being used as an early  
59 warning system (Betancourt et al. 2020, Medema et al. 2020a, Ahmed et al. 2021) enabling  
60 rapid and targeted measures to limit the COVID-19 transmission. Wastewater surveillance is  
61 also an efficient tool to monitor the emergence of (signature mutations of) new variants-of-  
62 concern in communities, using targeted sequencing (Rios et al., 2021; Rothman et al., 2021;  
63 Jahn et al., 2021) or targeted PCR methods (Graber et al., 2021, Heijnen et al. 2021). A key  
64 advantage of wastewater surveillance is the possibility to obtain objective information about  
65 virus circulation in a community. The 'traditional' surveillance of reported cases is subject to  
66 bias by (changes in) testing strategies, access to testing, and compliance of communities,  
67 and reflect only those that get tested. SARS-CoV-2 concentrations in community wastewater  
68 are independent of testing behavior, thereby providing a more complete and objective image  
69 of the virus circulation in the community provided there is unrestricted access to sanitation.  
70 Public health agencies use the wastewater signal to spot changes in testing behavior over  
71 time or between communities (de Graaf et al, in preparation) and to verify the trends in  
72 reported cases in communities. Decision-making on (partial) lockdowns and travel  
73 restrictions requires up-to-date and reliable information on trends in virus circulation,  
74 preferably at a high spatial resolution. The relevant time window of many of these decisions  
75 is the information of 1 - 2 antecedent weeks; i.e. the weekly updates of the epidemiological  
76 situation (e.g. <https://www.rivm.nl/en/coronavirus-covid-19/weekly-figures> ) and the maps in

77 support of the Council Recommendation on a coordinated approach to travel measures in  
78 the EU at [https://www.ecdc.europa.eu/en/covid-19/situation-updates/weekly-maps-](https://www.ecdc.europa.eu/en/covid-19/situation-updates/weekly-maps-coordinated-restriction-free-movement)  
79 [coordinated-restriction-free-movement](https://www.ecdc.europa.eu/en/covid-19/situation-updates/weekly-maps-coordinated-restriction-free-movement), that is based on the testing, positivity and notification  
80 rate over a time frame of 2 weeks. To monitor trends in SARS-CoV-2 circulation via  
81 wastewater in a similar time frame, frequent and representative sampling of a community is  
82 necessary. Sample collection typically takes place as 24 h composite samples to account for  
83 the typical diurnal pattern associated with wastewater production and toilet use (Medema et  
84 al., 2020b; Ort et al. 2010). In addition, wastewater concentrations can be affected by the  
85 dilution of domestic wastewater in other water in the sewerage network, such as stormwater  
86 runoff, groundwater or industrial discharges. This dilution may vary in time; wet weather  
87 discharges can be many times the dry weather discharge of sewers. To account for this  
88 variable dilution, normalisation of the measured concentrations by the (daily) flow of  
89 wastewater into daily loads is a common procedure in Wastewater Based Epidemiology  
90 (WBE), building on methods and procedures developed over the last decade mainly for drug  
91 use monitoring (Castiglioni et al., 2014). For SARS-CoV-2 normalisation, the measured RNA  
92 concentration in the 24h composite sample can be multiplied by the wastewater flow of the  
93 last 24h at the sampling site to compute the daily viral load. This load can in turn be  
94 normalised for the population of the sewershed to be able to compare the loads between  
95 different areas. The underlying assumption of this flow normalisation approach (Castiglioni et  
96 al., 2014) is that the sample taken is representative of the domestic wastewater volume  
97 being discharged by the population served by the pumping station or wastewater treatment  
98 plant (WWTP). However, there are several situations where this assumption does not hold.  
99 They may be attributed to short term changes in population size due to commuters or  
100 tourism, or to sewer system dynamics, such as spills of SSOs (sanitary sewer overflows) due  
101 to blockages, spills of CSOs during heavy rainfall, transport delays in pressure mains which  
102 vary strongly during dry weather and wet weather or delays in the transport of wastewater to  
103 the WWTP due to pump failures or other operational issues. In these situations, the  
104 wastewater flow at the inlet of the wastewater treatment plant is not representing the amount

105 of wastewater that is produced in that sewershed on that day. Consequently, there is a need  
106 for additional quality control in WBE. Normalisation by two independent parameters could be  
107 the way forward to check for representativeness of the sample for the shedding of SARS-  
108 CoV-2. In addition, in many locations flow data is unavailable, resulting in a need for other  
109 types of normalisation parameters.

110 Many examples of parameters that may be used to normalise wastewater samples are  
111 available. Launay et al. (2016) propose the use of electric conductivity (EC) as a proxy of the  
112 dilution of wastewater due to storm water or ground water dilution. They showed that the  
113 dilution calculated based on EC gives similar results as the use of inert human wastewater  
114 tracers such as ibuprofen, naproxen and diclofenac. Many other human wastewater tracers  
115 are less applicable as tracer due to e.g. a higher back ground variation or degradation in the  
116 sewer (Gao et al., 2017). EC was selected as a cheap parameter which can be reliably  
117 measured. Tandukar et al. (2020), Bivins et al. (2020) and Medema et al. (2020b) assessed  
118 the applicability of several chemical and biological markers for human input in wastewater.  
119 Like others (Crank et al., 2020; Hillary et al., 2021; Wilder et al., 2021; Heijnen et al., 2021),  
120 we selected CrAssphage, given it is a highly abundant virus (almost) exclusively found in  
121 human feces and is present in humans world-wide (Edwards et al., 2019). High CrAssphage  
122 concentrations are reported in domestic wastewater globally, and the concentrations do not  
123 show significant seasonal variation (Balleste et al., 2019), making them a potentially useful  
124 index for the human fecal fraction of wastewater.

125 The aim of this study was to develop a procedure for quality control and normalisation of  
126 wastewater samples, in order to allow quantitative trend analysis of SARS-CoV-2 in support  
127 of public health decision-making. We compared and evaluated three methods for  
128 normalisation: the 'standard' daily wastewater flow rate and population normalisation, electric  
129 conductivity (EC) as a proxy for dilution and the human fecal biomarker crAssphage. In  
130 addition, we analysed whether a combination of two normalisation methods can be used as a  
131 quality check and normaliser of SARS-CoV-2 RNA concentration data.

## 132 2. Material and methods

### 133 2.1. Wastewater surveillance Rotterdam Rijnmond

134 In and around the city of Rotterdam (the Netherlands), 9 catchment areas were selected for  
135 wastewater sampling (Figure 1). Four catchment areas were sampled at the wastewater  
136 treatment plant Dokhaven (INF2, INF3, INF4 and INF5-6), sampling from the pressure mains  
137 arriving at the Wastewater Treatment Plants (WWTP). These four areas make up about half  
138 of the urban area of the city of Rotterdam and vary in population between 27.044 and  
139 138.280 people (CBS, 2020). Catchment area Pretorialaan (71.325 inhabitants) constitutes  
140 roughly half of the Dokhaven INF3 area, and catchment area Katendrecht (4.884 inhabitants)  
141 is a small subcatchment of the Pretorialaan catchment. Both catchments are sampled at their  
142 respective sewer pumping stations serving the area. The sewer system is cascading  
143 meaning that wastewater from Katendrecht is first sampled at sewer pumping station  
144 Katendrecht, then again at sewer pumping station Pretorialaan (diluted with wastewater from  
145 the rest of the Pretorialaan area), and finally again at Dokhaven INF3 (further diluted).  
146 Outside the WWTP Dokhaven area, three predominantly residential areas have been  
147 selected for surveillance: Ommoord (28.434 inhabitants), Bergschenhoek (18.750  
148 inhabitants) and Rozenburg (12.374 inhabitants). Ommoord and Bergschenhoek were  
149 sampled at their respective sewer pumping stations, Rozenburg at the WWTP serving  
150 exclusively the Rozenburg area.  
151 The sewer network in the Rotterdam area is largely combined, with separate sewer only in  
152 more recently developed and renovated areas.

## 153 [2.2. Wastewater sampling and data](#)

154 At all sampling sites automated composite samplers (Endress+Hauser Liquistation CSF48  
155 and ASP2000 stations) were used to collect flow-proportional 24h composite wastewater  
156 samples. The autosamplers were programmed to collect 50 mL aliquots per fixed volume of  
157 wastewater (as measured by the flow sensors at the WWTPs/pumping stations). This fixed  
158 volume varied between 12 m<sup>3</sup> (Katendrecht) and 170 m<sup>3</sup> (Dokhaven INF3) and was selected  
159 to ensure a minimum of 100 aliquots (5 L of sample) for each 24h sample throughout the  
160 year (NEN6600). All locations followed the same sampling schedule: three 24h samples per  
161 week (Sun 08h00 - Mon 08h00, Tue 08h00 - Wed 08h00 and Thu 08h00 - Fri 08h00) from  
162 September 2020 (Bergschenhoek: January 2021) to August 2021. Samples were stored  
163 inside the autosampler at a temperature between 1°C and 5°C until sample collection (Mon,  
164 Wed and Fri between 08h00 and 16h00). At the time of sample collection, the collected  
165 composite sample was mixed by manual stirring and an aliquot of 250 mL was collected from  
166 the container in the autosampler, stored in a sterile flask and transported at 4°C to the  
167 laboratory.

168 Upon sample collection the quality of each sample was assessed comparing the theoretical  
169 sample volume (number of aliquots in 24h, multiplied by aliquot volume) with the actual  
170 sample volume. In case of sampling 'failure' (> 7,5% difference according to NEN6600),  
171 details of the sampling process were further studied to determine whether the sample could  
172 still be included in the data set. Overall approximately 5-7% (depending on the location) of all  
173 sampling failed completely (not a single aliquot in the container in a 24h period) due to e.g. a  
174 power cut, maintenance activities, clogging of the autosampler, public holidays etc. For  
175 another 5-15 % of samples a deviation of more than 7,5% was observed. These were  
176 caused mainly by (partial or temporal) clogging of the equipment (relatively often coinciding  
177 with storm events) or logistical errors in the field. Overall, 89,6 % of potential samples could  
178 be used for processing.

179

180 [2.3. Virus concentration and nucleic acid extraction](#)



181 Samples were processed within one week after sampling using the procedure as previously  
182 described (Medema et al 2020). In short, centrifugation was used as pre-treatment to remove  
183 larger particles. Virus particles were concentrated from 50 ml supernatant by ultrafiltration  
184 through Centricon® Plus-70 centrifugal ultrafilters with a cut-off of 30 kDa (Millipore,  
185 Amsterdam, Netherlands). Mouse Hepatitis Virus (MHV)-A59 (Department Medical  
186 Microbiology, Leiden University Medical Center, Leiden, Netherlands) was spiked to each  
187 concentrate as quality control. Nucleic acid was extracted from the concentrate with the  
188 Biomerieux Nuclisens kit (Biomerieux, Amersfoort, Netherlands) in combination with the  
189 semi-automated KingFisher mL (Thermo Scientific, Bleiswijk, Netherlands) as previously  
190 described. Extracted nucleic acid was eluted in a volume of 100 µl.

191

#### 192 [2.4. RT-qPCR for Coronavirus RNA-quantification in wastewater](#)

193 The N2 and E\_Sarbeco gene fragments of SARS-CoV-2 were used as qRT-PCR targets,  
194 N2 was used for quantification, E\_Sarbeco for confirmation (both needed to be present for a  
195 positive result). Reagents and reaction conditions were as previously described (Medema et  
196 al. 2020; Heijnen et al. 2021). All RT-PCR's were run as technical duplicates on 5 µl  
197 extracted nucleic acid. Reactions were considered positive if the cycle threshold was below  
198 40 cycles. Spiked MHV-A59 RNA was detected by performing a MHV-A59 specific RT-qPCR  
199 targeting the N-gene using the primers and reaction profile described by (Raabenet al. 2007).

200

#### 201 [2.5. PCR for CrAssphage quantification in wastewater and feces](#)

202 A CrAssphage CPQ\_064 specific PCR (Stachler, Kelty et al. 2017) was used to quantify this  
203 DNA-virus. Assays were performed in duplicate on 5 µl 1:10 diluted extracted nucleic acid as  
204 described previously (Heijnen et al. 2021).

205

## 206 2.6. PCR for CrAssphage quantification in stool samples

207 Feces swabs from 221 patients from the Rotterdam Rijnmond region that were tested  
208 positive for SARS-CoV-2, were collected in 3 ml of viral transport medium. Samples were  
209 spun down for 5 min at 17,000 g, nucleic acids were isolated from 200µl supernatant using  
210 the high pure RNA isolation kit (Roche) while omitting the DNase I step. The RT-PCR  
211 described in 2.5 was used to quantify levels of CrAssphage. This study was approved by the  
212 Medical Ethical Committee of Erasmus MC under MEC-2020-0617

213

## 214 2.7. Normalisation procedure

215 In the study, three normalisation procedures have been developed to be able to assess flow,  
216 EC and crAssphage as normalisation parameters. In each procedure, the percentage of  
217 *domestic* wastewater in was determined. The flow based normalisation procedure comprises  
218 the following steps:

- 219 1. Preparation step: determine the number of inhabitants in the catchment and  
220 determine the domestic dry weather flow (ddwf) expressed in litres per person per  
221 day. In the Netherlands, the ddfw is very stable at 120 l pppd ([www.riool.net](http://www.riool.net)). In other  
222 countries, the ddfw may vary per location and can typically be obtained via local  
223 sewer authorities.
- 224 2. Determine the proportion of domestic sewage in a wastewater sample using flow  
225 data:

$$226 \quad \% \text{ domestic sewage}(Q) = \frac{\# \text{ inhabitants} * \text{ddwf}}{V_{24h}} * 100\% \quad (1)$$

227 where ddfw = average daily domestic wastewater production per person,  $V_{24h}$  = measured  
228 wastewater volume over 24 h sampling time

229 The EC based normalisation procedure requires more additional data to enable direct  
230 comparison with the flow base normalisation:

- 231 1. Determine number of inhabitants, the average domestic dry weather flow in litres per  
232 person per day and the average sewage dry weather flow, which is used as a  
233 reference to account for the dilution with extraneous water during dry weather. This  
234 average dry weather flow can be extracted as the 40<sup>th</sup> percentile from a time series of  
235 flow data at the sampling site (Mulder et al., 2020). For most monitoring locations, the  
236 difference between the 30<sup>th</sup> and 50<sup>th</sup> percentile value is relatively small. For  
237 catchments with a strong seasonal variation of the amount of extraneous waters, it  
238 may be necessary to derive a reference for the wet and dry season. This assessment  
239 is easy to make using the methods as described in Weiß et al, 2002.
- 240 2. Determine the reference EC value during dry weather flow by taking the average of all  
241 days with a daily flow volumes ranging between the 10<sup>th</sup> and 50<sup>th</sup> percentile derived  
242 from a 1 year time series. Days with flows smaller than the 10<sup>th</sup> percentile could be  
243 affected by operational irregularities, such pump failures or drinking water outage,  
244 while flows above the 50<sup>th</sup> percentile could be affected by (small) storm events.
- 245 3. Determine the proportion of domestic sewage in a wastewater sample using EC data:

$$246 \quad \% \text{ domestic sewage (EC)} = \frac{\# \text{ inhabitants} * d d w f}{V_{D W F \text{ ref}}} * \frac{E C_{\text{sample}}}{E C_{D W F \text{ ref}}} 100\% \quad (2)$$

247 where  $V_{D W F \text{ ref}}$  = average wastewater volume during dry weather flow (40<sup>th</sup> percentile of daily  
248 volumes derived from 1 year time series of flow monitoring,  $E C_{\text{sample}}$  = measured EC in  
249 sample,  $E C_{D W F \text{ ref}}$  = average EC of all samples with flows ranging between 10<sup>th</sup> and 50<sup>th</sup>  
250 percentile of daily volumes derived from 1 year time series of flow monitoring).

251 Please note that the  $V_{D W F \text{ ref}}$  also contains industrial wastewater and extraneous water. The  
252 first term in equation 2 in fact describes the dilution during dry weather flow, the second term  
253 in the equation the additional dilution during storm event.

254

255 The crAssphage based normalisation follows the same approach as the EC based  
256 normalisation and only differs in the parameter used: CrAssphage instead of EC:

257 1. The concentration during dry weather flow is taken as a reference to enable  
258 calculating the proportion of domestic sewage during wet weather using eq 3).

$$259 \quad \% \text{ domestic sewage } (CrAss) = \frac{\# \text{ inhabitants} * dwf}{V_{DWF \text{ ref}}} * \frac{CrAss_{\text{sample}}}{CrAss_{DWF \text{ ref}}} 100\% \quad (3)$$

260 where  $V_{DWF \text{ ref}}$  = average wastewater volume during dry weather flow (40<sup>th</sup> percentile of daily  
261 volumes derived from 1 year time series of flow monitoring),  $CrAss_{\text{sample}}$  = measured CrAss in  
262 sample (genome copies/ml sample),  $CrAss_{DWF \text{ ref}}$  = average CrAss of all samples with flows  
263 ranging between 10<sup>th</sup> and 50<sup>th</sup> percentile of daily volumes derived from 1 year time series of  
264 flow monitoring, (genome copies/ml sample)).

265  
266 For all three normalisation parameters, normalisation of the SARS-CoV-2 RNA concentration  
267 in wastewater is performed by multiplying the measured concentration with the reciprocal of  
268 the proportion of domestic sewage in the sample. This is expressed as SARS-CoV-2 N2  
269 RNA concentration (in gene copies) per mL of domestic wastewater, and enables direct  
270 comparison of the three normalisation parameters.

## 271 3. Results and discussion

### 272 3.1. Normalisation factors differ in time and space

273 In total, data from 1207 samples from the 9 different city areas from September 2020-August  
274 2021 are available. Flow based normalisation was applied after performing the normalisation  
275 procedure by multiplying the lab result (# SARS-CoV-2 N2 gene copies/ml sample) with the  
276 reciprocal of the proportion of domestic wastewater. Figure 2 gives an overview of the  
277 proportion of domestic wastewater per sample. The large range is due to the fact that all  
278 catchments are served by combined sewer systems, which show high dilutions and  
279 consequently, low proportions of domestic wastewater, during storm events. As example,  
280 Figure 3 shows how storm events affect the observed SARS-CoV-2 concentration for INF3,  
281 with a variable normalisation factor up to 2.8. In addition to dilution due to rain water, the  
282 median of the correction factors ranges between 2.0 and 3.5. This indicates that also during  
283 dry weather a significant proportion of the wastewater sampled consists of non-domestic  
284 sources, such as extraneous waters and industrial wastewater. The sewer system of  
285 Rotterdam is known for its high proportion of extraneous waters. At WWTP Dokhaven, the  
286 average amount of extraneous waters during dry weather flow is 43% of the total influent  
287 (Vosse, 2013). Catchment INF 2 Everlo Waalhaven also discharges a substantial amount of  
288 industrial wastewater, while catchment Ommoord shows a strongly time-varying amount of  
289 extraneous water (see figures S1) with a rather high salinity. This is most likely brackish  
290 drainage water in this catchment which is at 5 meters below sea level. The large differences  
291 in correction factors implicate that directly comparing measured SARS-CoV-2 concentrations  
292 in different city areas without normalisation could result in an incorrect assessment of the  
293 relative concentration levels, both within a location over time (trends) and between locations.

294

295

296 [3.2. Impact of dilution on observed SARS-CoV-2 trends](#)

297 Flow based normalisation corrects the measured SARS-CoV-2 concentration for the dilution  
298 rate of the domestic part of the wastewater. Figure 4 gives an example for the INF3  
299 catchment, all other sites are in the supplementary material. During storm (= high flow)  
300 events, the correction factor is higher while on dry days the correction factor is smaller. The  
301 long-term trend is not affected, as the catchment in Rotterdam does not show a season-  
302 dependent runoff volume and also does not show a seasonal trend in the amount of  
303 extraneous water (Vosse, 2013).

304

305

306 As stated before, the relevant timescale of trend information for public health agencies is in  
307 the range of 1-2 weeks. On such a short notice, 2 weeks of consecutive dry weather as well  
308 as 2 weeks of consecutive wet weather are both not unlikely. Especially longer periods with  
309 wet weather could result in several subsequent samples being diluted. Figure 5 zooms in on  
310 the first 4 months of the time series of site INF3. On several occasions, October 5<sup>th</sup>-12<sup>th</sup>,  
311 November 11<sup>th</sup>-16<sup>th</sup>, and December 18<sup>th</sup> –30<sup>th</sup>, uncorrected lab results clearly suggested a  
312 downward trend in SARS-CoV-2 levels in the sewage. All were in weeks with rain, and the  
313 normalised SARS-CoV-2 levels in domestic sewage in the same periods clearly showed a  
314 different trend. From October 30<sup>th</sup> – November 6<sup>th</sup>, the uncorrected lab results suggested an  
315 upward trend, while the normalised SARS-CoV-2 levels showed a downward trend as  
316 dilution decreased due to less inflow. Similar differences were observed at the other sites  
317 (SI).

318

319

320 [3.3. Flow based normalisation versus EC and CrAssphage based](#)

321 [normalisation](#)

322 The three types of normalisation, flow based, EC based and CrAssphage based, result in  
323 comparable long term trends in normalised SARS-CoV-2 levels of INF3 (figure 6), apart from  
324 a few aberrations. In the second week of February 2021, an increased EC was observed due  
325 to road de-icing and as a consequence, the EC based correction factors were lower than the  
326 flow based correction factors. CrAssphage based normalisation deviated strongly from flow  
327 based and EC based normalisation in the period between March 8<sup>th</sup> – 15<sup>th</sup>. Figure 7 shows  
328 the CrAssphage load per person and day for the entire monitoring period of INF3 (other  
329 areas in SI), showing a fairly constant load over the monitoring period, with the exception of  
330 the mentioned period. This deviation was observed at all monitoring locations with a similar  
331 trend, indicating an issue in the analyses of CrAssphage in this period, even though re-  
332 inspection of the procedure and data did not show deviations. Apart from this, differences  
333 between flow based, EC based and CrAssphage based normalisation seem to be incidental  
334 with a slight underestimation of the EC and CrAss based normalisation, see figure 8. The  
335 flow based normalisation results in exactly the same trend as the daily load calculation as  
336 applied in the Dutch national sewage surveillance conducted by the National Institute for  
337 Public Health and the Environment (SARS-CoV-2 concentration in sample \* daily flow per  
338 100.000 inhabitants [https://coronadashboard.rijksoverheid.nl/verantwoording#virusdeeltjes-](https://coronadashboard.rijksoverheid.nl/verantwoording#virusdeeltjes-in-rioolwater)  
339 [in-rioolwater](https://coronadashboard.rijksoverheid.nl/verantwoording#virusdeeltjes-in-rioolwater) ). The EC based normalisation showed an  $R^2$  of 0,96 with the daily load, while  
340 the CrAss based normalisation results in an  $R^2$  of 0.92. Flow based normalisation gave the  
341 best correspondence with the standard daily load calculation (Castiglioni et al., 2014), while  
342 EC based and CrAss based normalisation yielded very comparable results.

343

344 .

345 **3.4. Parallel normalisation methods provide quality control**

346 The relative close agreement between flow, EC and CrAssphage based normalisation  
347 provides a good basis for quality control of SARS-CoV-2 samples. Of our 1207 SARS-CoV-2  
348 samples, 32 (2.8%) yielded a low CrAssphage concentration ( $<10^4$  GC/ml). 20 of those were  
349 from Ommoord, the site with the most variable proportion of extraneous waters, and these  
350 samples also had a high EC ( $>2000$   $\mu\text{S}/\text{cm}$ ). In these low CrAssphage samples, SARS-CoV-  
351 2 N2 concentration was also low or absent. The recovery efficiency of the detection methods  
352 for both viruses was low in these samples, possibly due to the presence of humic acids in  
353 brackish groundwater coming via clay and peat layers entering the sewer network at this site.  
354 Recovery efficiency did not decrease due to high EC due to road de-icing. The data from  
355 these samples were therefore excluded from further analysis. Similarly, CrAssphage  
356 provided a basis for quality control of detection methods, In August 2020, supply shortages  
357 forced us to use other ultrafilters than Centricon. Even though an initial comparison between  
358 Centricon and the alternative filters indicated comparable SARS-CoV-2 recoveries, the  
359 CrAssphage concentrations obtained in successive wastewater samples processed with  
360 these alternative filters were more than 10-fold lower than in the previous sample series.  
361 Therefore, data obtained with these alternative filters were not used (data not shown).  
362 Moreover, CrAssphage, as a quantitative marker of human feces, also provides the  
363 opportunity to check the most basic number in WBE: the population size. When we prepared  
364 the monitoring project in summer 2020, we have checked the population size via the  
365 municipality of Rotterdam and the Dutch institute of statistics, CBS. These numbers are  
366 shown in figure 1. For each monitoring location, we calculated the average CrAssphage  
367 concentration in dwf samples, shown in SI. The proportion of domestic wastewater of figure 2  
368 agreed to a large extend with the average CrAssphage concentration during dwf, except for  
369 catchment Katendrecht. A check of the population data of Katendrecht, based on 2020 and  
370 2021 data, learnt that the population in Katendrecht was no longer 4.884 inhabitants, but  
371 5.600 in 2020 and 5.700 in 2021. After adjusting this population number, the adjusted  
372 normalisation factors showed good agreement with average CrAssphage during dwf.  
373



374 The EC and CrAssphage data also provided a quality control for the flow normalisation. We  
375 developed a procedure to perform the flow and EC based normalisations in parallel. If these  
376 two normalisations result in domestic wastewater proportions that differ less than 10%, the  
377 flow based normalisation is considered successful and reliable. If the two methods differ  
378 more than 10%, it is necessary to analyse the data in more depth and identify the cause of  
379 the difference. Figure 9 gives an example for the catchment Katendrecht. Overall, there is a  
380 good agreement between the flow and EC based normalisation with a few exceptions. Two  
381 of the exceptions occurred close after each other in January 2021. On these days, the  
382 pumping station was non-operational between January 19<sup>th</sup> 14h00 and January 21<sup>st</sup> 11h00.  
383 Consequently, the flow proportional sampling of January 20<sup>th</sup> only collected samples from  
384 08h00 until the pump failure at 14h00, hence only representing a fraction of the full  
385 wastewater production of the area on that day (the other fraction being stored in the sewer  
386 system during the pump failure). On January 22<sup>nd</sup> the opposite occurred: after the re-start,  
387 the pumping station processed all wastewater of the preceding 48 hours that had been  
388 stored in the sewer system (daily volume: 4635 m<sup>3</sup>), leading to a 24h sample that was not  
389 representative of the targeted 24 hours. This is an example of a situation where the flow at  
390 the monitoring location was no longer representative of the domestic wastewater produced in  
391 the catchment. In both cases, EC based normalisation has been applied instead of flow  
392 based normalisation. Figure 9 also shows that on these days, CrAssphage and EC based  
393 normalisation would have resulted in similar normalised SARS-CoV-2 concentrations.

394

395 [3.5. CrAssphage based normalisation](#)

396 In order to be able to compare CrAssphage based normalisation with flow and EC based  
397 normalisation, flow data were needed to calculate the dwf average value for the CrAssphage  
398 and EC normalisation. In situations where flow data is unavailable, it is not possible to first  
399 derive this dwf average to serve as a reference for calculation dilution of the domestic  
400 wastewater with industrial wastewater, runoff and extraneous waters. In those situations,  
401 direct normalisation using the ratio SARS-CoV-2/CrAssphage can be applied, as  
402 CrAssphage based normalisation using the dwf average renders the exact same SARS-CoV-  
403 2 concentration trends as using the ratio SARS-CoV-2/CrAssphage. In the catchments of  
404 Rotterdam, with population varying from 5.600 to 138.280, the CrAssphage load per person  
405 per day was very comparable between city areas (Figure 10) and constant over time (Figure  
406 7 and Figures S2), making CrAssphage suitable for direct normalisation for the human faecal  
407 fraction in wastewater samples at the population sizes in this study (5.600 and up).

### 408 3.6. CrAssphage in stool samples

409 Stool samples were collected from SARS-CoV-2 positive adults (N=221) that notified their  
410 general practitioner of a positive SARS-CoV-2 test performed at the GGD testing streets. The  
411 CrAssphage concentrations in these stool samples showed very large variation, spanning  
412 more than  $10 \log^{10}$  units (Figure 11). A small percentage (4.5%) had no detectable (<140  
413 GC/ml faeces) CrAssphage in their stool sample. In the positive stool samples, a bimodal  
414 distribution was observed, with peaks at  $10^{3.5}$  and at  $10^{8.5}$  GC/ml faeces.

415 The arithmetic average concentration of CrAssphage in stool samples is  $3.39 \times 10^9$  GC/ml  
416 faeces. This average was largely determined by a single stool sample contained an  
417 extremely high concentration ( $10^{12}$ /ml). The high concentration was confirmed by re-analysis  
418 of the sample. Because of the bimodal distribution of CrAssphage in stool samples, the very  
419 high concentration in the small proportion of samples is dominant in determining the  
420 arithmetic average. To be less dependent on data from a single stool sample, the shedding  
421 data were fitted to two separate Normal distribution after log-transformation, one for the low  
422 shedding part of the population (66.1%, including the non-detects), with an average of 3.474  
423 LOG GC/ml and a standard deviation of 0.843 LOG GC/ml, and one for the high shedding  
424 part (33.9%, with an average of 8.413 LOG GC/ml and a standard deviation of 0.950 LOG  
425 GC/ml. With the average of the high shedding proportion of the population, and an average  
426 stool production of 128 g wet weight ( $\approx$ ml) pppd (Rose et al., 2015), the average CrAssphage  
427 load of the population would be  $1.12 \times 10^{10}$  GC pppd. This is close to the average measured  
428 CrAssphage load in the wastewater of the city areas of  $1.9 \times 10^{10}$  pppd. CrAssphage is quite  
429 stable in the environment (Balleste et al, 2019). The lack of correlation between daily flow  
430 and daily CrAssphage-load per person (Figure 7) suggests that there is no significant build-  
431 up of CrAssphage in sediments or biofilm in the sewer network (Balleste et al., 2019), unlike  
432 for other parameters such as COD and TSS (Schilperoort et al., 2012), see also figures in  
433 S3, or pollutants that show a strong adsorption to TSS (Gasperi et al., 2014).

434 Compared to the variability of CrAssphage shedding per person, the observed CrAssphage  
435 concentration in wastewater was very comparable between different city areas and over  
436 time. This indicates that, even though the variation in CrAssphage shedding between  
437 individuals is very high, the ‘population shedding’ is fairly constant in population sizes of  
438 5.600 and above. Although CrAssphage has been shown to reside in the human gut for  
439 months (Siranosian et al., 2020; Honap et al., 2020; Tamburini et al., 2021), little is known  
440 about the CrAssphage shedding dynamics per person over time. A longitudinal study in three  
441 infants showed considerable variation over the first year of life (Taboada et al, 2021), but a  
442 study among ten healthy adults showed that the human gut virome composition is  
443 personalized and relatively stable over time, including for CrAssphage (Shkoporov et al.,  
444 2019). The high variability in CrAssphage concentration in stool samples observed in this  
445 study, would imply that CrAssphage would become less suitable as normaliser in small  
446 populations.

## 447 4. Conclusions

448 This study showed that without normalisation SARS-CoV-2 sewage data may misrepresent  
449 the actual short-term trends of COVID-19 circulation in the population due to the impact of  
450 rain and snowmelt in a combined sewer network. Unnormalised data do show similar long-  
451 term trends as normalized data, but it is the short-term (1-2 weeks) trends are the most  
452 relevant to support public health actions to limit the transmission of the virus and where  
453 discrepancies were considerable. Also, for comparison of SARS-CoV-2 circulation in city  
454 areas (or cities), normalisation is needed to compensate for the different proportions of  
455 extraneous water in different (parts of the) sewer networks.

456 Flow appears to be most appropriate normalizer, for only a few examples in our many data  
457 (2/1207; 0.17%) flow was not appropriate, due to sewer blocking. Since EC captured these  
458 errors, we propose flow-based normalisation in combination with an EC check. In our study,  
459 EC had the added value of picking up brackish groundwater intrusion and road de-icing, the  
460 latter being associated with reduced recoveries of the CrAssphage and SARS-CoV-2  
461 detection methods.

462 The CrAssphage loads per population per day was very comparable between city areas and  
463 constant over time, making CrAssphage-based normalisation an adequate alternative  
464 normalization procedure in the absence of flow data or in situations where flow data become  
465 unreliable. CrAssphage could also be used to normalize the results of passive samplers, an  
466 upcoming method of monitoring SARS-CoV-2 (Shang et al., 2021) by serving as index for the  
467 human fecal matter captured in the samplers. CrAssphage shedding per person in stool data  
468 was highly variable. This would imply that CrAssphage normalization may become unreliable  
469 if the sampled population is small. Further research on the limits of application is necessary.  
470

## 471 Acknowledgements

472 The authors are very grateful for the assistance of the Water Authorities and WWTP and  
473 pumping station operators of Waterschap Hollandse Delta and municipality of Rotterdam,  
474 staff of IMD for installing and maintaining the autosamplers and sampling specialists of  
475 AQUON, Toke Mulder – van Kempen and Eline Hoogteijling for assisting with the inclusion of  
476 the patients for the fecal sampling study. This study was financed by STOWA, TKI  
477 Watertechnology in collaboration with Erasmus Foundation, Adessium Foundation, European  
478 Union's Horizon H2020 grant VEO (grant no. 874735), Ministry of Health, Welfare and Sport,  
479 H2020 and Waterboards Waterschap Hollandse Delta, Hoogheemraadschap van Delfland  
480 and Hoogheemraadschap Schieland en Krimpenerwaard. The authors would like to thank all  
481 the patients that contributed to the fecal sampling study as well as all the included GP-  
482 practices.  
483

## 484   References

- 485   Ahmed, W, Bivins A., Bertsch, P.M., Bibby, K., Gyawali P., Sherchan, S.P., Simpson, S.L.,  
486   Thomas, K.V., Verhagen, R., Kitajima, M.,Mueller, J.F., Korajkic, A., (2021). Intraday  
487   variability of indicator and pathogenic viruses in 1-h and 24-h composite wastewater  
488   samples: Implications for wastewater-based epidemiology. *Environmental Research* 193  
489   (2021) 110531
- 490   Ahmed, W., Tscharke, B. Bertsch, P. M. Bibby, K. Bivins, A. Choi, P. Clarke, L. Dwyer, J.  
491   Edson, J. Nguyen, T. M. H. O'Brien, J. W. Simpson, S. L. Sherman, P. Thomas, K. V.  
492   Verhagen, R. Zaugg J. and Mueller J. F. (2021). "SARS-CoV-2 RNA monitoring in  
493   wastewater as a potential early warning system for COVID-19 transmission in the  
494   community: A temporal case study." *Sci Total Environ* 761: 144216.
- 495   Ahmed, W.D., Paul M.; Bibby, K., Haramoto, E., Hewitt, J., Huygens, F., Gyawali, P.,  
496   Korajkic, A., Riddell, S., Sherchan, S.P., Simpson, S.L., Sirikanchana, K., Symonds, E.R.,  
497   Verhagen, R., Vasan, S.S., Kitajima, M., Bivins, A. (2020). Decay of SARS-CoV-2 and  
498   surrogate murine hepatitis virus RNA in untreated wastewater to inform application in  
499   wastewater-based epidemiology, *Environmental Research* (2020).
- 500   Ai Y, Davis A, Jones D, Lemeshow S, Tu H, He F, Ru P, Pan X, Bohrerova Z, Lee J. (2021).  
501   Wastewater SARS-CoV-2 monitoring as a community-level COVID-19 trend tracker and  
502   variants in Ohio, United States. *Sci Total Environ*. 2021 Dec 20;801:149757. doi:  
503   10.1016/j.scitotenv.2021.149757.
- 504   Altmann, D. M., R. J. Boyton and R. Beale (2021). "Immunity to SARS-CoV-2 variants of  
505   concern." *Science* 371(6534): 1103-1104.
- 506   Asero FJR, Moya Ruano LA, Del Real PR, Gómez LC, Lorusso N. (2021). Associations  
507   between SARS-CoV-2 RNA concentrations in wastewater and COVID-19 rates in days after  
508   sampling in small urban areas of Seville: A time series study. *Sci Total Environ*. 2021 Sep  
509   25;806:150573. doi: 10.1016/j.scitotenv.2021.150573.

510 Ballesté,E., Pascual-Benito, M. Martín-Díaz, J. , Blanch, A.R. , Lucena, F. , Muniesa, M.  
511 Jofre, J. García-Aljaro, C. (2019). Dynamics of crAssphage as a human source tracking  
512 marker in potentially faecally polluted environments,Water Research, 155 233-244  
513 <https://doi.org/10.1016/j.watres.2019.02.042>.  
514 Betancourt WQ, Schmitz BW, Innes GK, Prasek SM, Pogreba Brown KM, Stark ER, Foster  
515 AR, Sprissler RS, Harris DT, Sherchan SP, Gerba CP, Pepper IL. (2021). COVID-19  
516 containment on a college campus via wastewater-based epidemiology, targeted clinical  
517 testing and an intervention. Sci Total Environ. 2021 Jul 20;779:146408. doi:  
518 10.1016/j.scitotenv.2021.146408.  
519 Betancourt, W. W., B. W. Schmitz, G. K. Innes, K. M. Pogreba Brown, S. M. Prasek, E. R.  
520 Stark, A. R. Foster, R. S. Sprissler, D. T. Harris, S. P. Sherchan, C. P. Gerba and I. L.  
521 Pepper (2020). "Wastewater-based Epidemiology for Averting COVID-19 Outbreaks on The  
522 University of Arizona Campus." medRxiv: 2020.2011.2013.20231340.  
523 Bivins A., Crank K., Greaves J., North D., Wu Z., Bibby K. (2020) Cross-assembly phage and  
524 pepper mild mottle virus as viral water quality monitoring tools—potential, research gaps, and  
525 way forward. Current Opinion in Environmental Science and Health Volume 16, Pages 54 –  
526 61 August 2020  
527 Bivins, A., D. North, A. Ahmad, W. Ahmed, E. Alm, F. Been, P. Bhattacharya, L. Bijlsma, A.  
528 B. Boehm, J. Brown, G. Buttiglieri, V. Calabro, A. Carducci, S. Castiglioni, Z. Cetecioglu  
529 Gurol, S. Chakraborty, F. Costa, S. Curcio, F. L. de Los Reyes, 3rd, J. Delgado Vela, K.  
530 Farkas, X. Fernandez-Casi, C. Gerba, D. Gerrity, R. Girones, R. Gonzalez, E. Haramoto, A.  
531 Harris, P. A. Holden, M. T. Islam, D. L. Jones, B. Kasprzyk-Hordern, M. Kitajima, N. Kotlarz,  
532 M. Kumar, K. Kuroda, G. La Rosa, F. Malpei, M. Mautus, S. L. McLellan, G. Medema, J. S.  
533 Meschke, J. Mueller, R. J. Newton, D. Nilsson, R. T. Noble, A. van Nuijs, J. Peccia, T. A.  
534 Perkins, A. J. Pickering, J. Rose, G. Sanchez, A. Smith, L. Stadler, C. Stauber, K. Thomas,  
535 T. van der Voorn, K. Wigginton, K. Zhu and K. Bibby (2020). "Wastewater-Based  
536 Epidemiology: Global Collaborative to Maximize Contributions in the Fight Against COVID-  
537 19." Environ Sci Technol 54(13): 7754-7757.



538 Bivins, A., Greaves, J., Fischer, R., Yinda, K.C. , Ahmed, W., Kitajima, M., Munster, V. J.,  
539 Bibby. K. (2020). Persistence of SARS-CoV-2 in water and wastewater, *Environ. Sci.*  
540 *Technol. Lett.* 7 (2020) 937–942.

541 Challen, R., E. Brooks-Pollock, J. M. Read, L. Dyson, K. Tsaneva-Atanasova and L. Danon  
542 (2021). "Risk of mortality in patients infected with SARS-CoV-2 variant of concern 202012/1:  
543 matched cohort study." *BMJ* 372: n579.

544 Crank, K., Xiang, L., North, D., Bonanno Ferraro, G., Iaconelli, M., Mancini, P., La Rosa, G.,  
545 Bibby,K.,(2020). CrAssphage abundance and correlation with molecular viral markers in  
546 Italian wastewater, *Water Research* 184 (2020) 116161

547 Davies, N. G., S. Abbott, R. C. Barnard, C. I. Jarvis, A. J. Kucharski, J. D. Munday, C. A. B.  
548 Pearson, T. W. Russell, D. C. Tully, A. D. Washburne, T. Wenseleers, A. Gimma, W. Waites,  
549 K. L. M. Wong, K. van Zandvoort, J. D. Silverman, K. Diaz-Ordaz, R. Keogh, R. M. Eggo, S.  
550 Funk, M. Jit, K. E. Atkins and W. J. Edmunds (2021). "Estimated transmissibility and impact  
551 of SARS-CoV-2 lineage B.1.1.7 in England." *Science*: eabg3055.

552 Davo, L., Seguí, R., Botija, P., Beltr, M.J., Albert, E., Torres, I., Lopez-Fernandez, P.A., Ortí,  
553 R., Maestre, J.F. Sanchez, G.,Navarro, D., (2021). Early detection of SARS-CoV-2 infection  
554 cases or outbreaks at nursing homes by targeted wastewater tracking. *Clinical Microbiology*  
555 *and Infection* 27 (2021) 1061-1063

556 de Graaf, M., Langeveld,J., Pos, J., Balmont, C.C., Franz, E., Izquierdo-Lara, R.W., Fanoy, E.,  
557 de Schepper,E.I.T., Koopmans, M.P.G. and Medema, G.J., (in prep.) Capturing the SARS-  
558 CoV-2 infection pyramid within the municipality of Rotterdam.

559 Esri-Nederland (2021). "Website: COVID-19 - Historische gegevens RIVM (accessed March  
560 2021)." <https://nlcovid-19-esri.nl-content.hub.arcgis.com/>.

561 Eurosurveillance-editorial-team (2021). "Updated rapid risk assessment from ECDC on the  
562 risk related to the spread of new SARS-CoV-2 variants of concern in the EU/EEA – first  
563 update." *Eurosurveillance* 26(3): 2101211.

564 Faria, N. R., T. A. Mellan, C. Whittaker, I. M. Claro, D. D. S. Candido, S. Mishra, M. A. E.  
565 Crispim, F. C. Sales, I. Hawryluk, J. T. McCrone, R. J. G. Hulswit, L. A. M. Franco, M. S.  
566 Ramundo, J. G. de Jesus, P. S. Andrade, T. M. Coletti, G. M. Ferreira, C. A. M. Silva, E. R.  
567 Manuli, R. H. M. Pereira, P. S. Peixoto, M. U. Kraemer, N. Gaburo, C. D. C. Camilo, H.  
568 Hoeltgebaum, W. M. Souza, E. C. Rocha, L. M. de Souza, M. C. de Pinho, L. J. T. Araujo, F.  
569 S. V. Malta, A. B. de Lima, J. D. P. Silva, D. A. G. Zauli, A. C. S. Ferreira, R. P.  
570 Schnekenberg, D. J. Laydon, P. G. T. Walker, H. M. Schlüter, A. L. P. Dos Santos, M. S.  
571 Vidal, V. S. Del Caro, R. M. F. Filho, H. M. Dos Santos, R. S. Aguiar, J. L. P. Modena, B.  
572 Nelson, J. A. Hay, M. Monod, X. Miscouridou, H. Coupland, R. Sonabend, M. Vollmer, A.  
573 Gandy, M. A. Suchard, T. A. Bowden, S. L. K. Pond, C. H. Wu, O. Ratmann, N. M. Ferguson,  
574 C. Dye, N. J. Loman, P. Lemey, A. Rambaut, N. A. Fraiji, M. Carvalho, O. G. Pybus, S.  
575 Flaxman, S. Bhatt and E. C. Sabino (2021). "Genomics and epidemiology of a novel SARS-  
576 CoV-2 lineage in Manaus, Brazil." medRxiv.  
577 Feng, S., Roguet, A., McClary-Gutierrez, J.S., Newton, R.J., Kloczko, N., Meiman, J.G. and  
578 McLellan, s., (2021). Evaluation of Sampling, Analysis, and Normalisation Methods for  
579 SARS-CoV-2 Concentrations in Wastewater to Assess COVID-19 Burdens in Wisconsin  
580 Communities. ACS EST Water 2021, 1, 1955–1965  
581 Gao, J., Banks, A., Li, J., Jiang, G., Lai, F.Y., Mueller, J.F., Thai, P.K., 2017. Evaluation of in-  
582 sewer transformation of selected illicit drugs and pharmaceutical biomarkers. Sci. Total  
583 Environ. 609, 1172–1181.  
584 Gasperi, J., Sebastian, C., Ruban, v., Delamain, M., Percot, S., Wiest, L., Mirande, C., Caupos,  
585 E., Demare, D., Diallo, Kessoo Kessoo, M., Saad, M., Schwartz, J. J. Dubois, P. Fratta, C.  
586 Wolff, H., Moilleron. R., Chebbo, G., Cren, C., Millet, M., Barraud, S., Gromaire, M. C. (2014).  
587 Micropollutants in urban stormwater: occurrence, concentrations, and atmospheric  
588 contributions for a wide range of contaminants in three French catchments Environ Sci Pollut  
589 Res (2014) 21:5267–5281

590 Garcia-Beltran, W. F., E. C. Lam, K. S. Denis, A. D. Nitido, Z. H. Garcia, B. M. Hauser, J.  
591 Feldman, M. N. Pavlovic, D. J. Gregory, M. C. Poznansky, A. Sigal, A. G. Schmidt, A. J.  
592 lafrate, V. Naranbhai and A. B. Balazs (2021). "Circulating SARS-CoV-2 variants escape  
593 neutralization by vaccine-induced humoral immunity." medRxiv.  
594 Graber T.E., Mercier É., Bhatnagar K., Fuzzen M., D'Aoust P.M., Hoang H.D., Tian X.,  
595 Towhid S.T., Plaza-Diaz J., Eid W., Alain T., Butler A., Goodridge L., Servos M., Delatolla R.  
596 (2021). Near real-time determination of B.1.1.7 in proportion to total SARS-CoV-2 viral load  
597 in wastewater using an allele-specific primer extension PCR strategy. *Water Res.* 2021 Oct  
598 15;205:117681. doi: 10.1016/j.watres.2021.117681.  
599 Heijnen, L., Elsinga, G.S., de Graaf, M., Molenkamp, R., Koopmans, R., Medema, G.J.  
600 (2021) – Droplet Digital RT-PCR to detect SARS-CoV-2 variants of concern in wastewater –  
601 MedRxiv (2021) – DOI: 10.1101/2021.03.25.21254324  
602 Hillary, L.S., Farkas, K., Maher, K.H., Lucaci, A., Thorpe, J., Distaso, M.A., Gaze, W.H.,  
603 Paterson, S., Burke, T., Connor, T.R., McDonald, J.E., Malham, S.K., Jones, D.L., (2020).  
604 Monitoring SARS-CoV-2 in municipal wastewater to evaluate the success of lockdown  
605 measures for controlling COVID-19 in the UK. *Water Research* 200 (2021) 117214  
606 Ho, J., C. Stange, R. Suhrborg, C. Wurzbacher, J.E. Drewes, A. Tiehm (2021). SARS-CoV-2  
607 wastewater surveillance in Germany: long-term PCR monitoring, suitability of primer/probe  
608 combinations and biomarker stability. medrxiv 2021.09.16.21263575  
609 Honap TP, Sankaranarayanan K, Schnorr SL, Ozga AT, Warinner C, et al. (2020)  
610 Biogeographic study of human gut-associated crAssphage suggests impacts from  
611 industrialization and recent expansion. *PLOS ONE* 15(1): e0226930.  
612 <https://doi.org/10.1371/journal.pone.0226930>  
613 [https://www.ecdc.europa.eu/en/covid-19/situation-updates/weekly-maps-coordinated-](https://www.ecdc.europa.eu/en/covid-19/situation-updates/weekly-maps-coordinated-restriction-free-movement)  
614 [restriction-free-movement](https://www.ecdc.europa.eu/en/covid-19/situation-updates/weekly-maps-coordinated-restriction-free-movement)  
615 <https://www.riool.net/huishoudelijk-afvalwater> (assessed 21-09-2021)  
616 <https://www.rivm.nl/en/coronavirus-covid-19/weekly-figures>

617 Izquierdo-Lara, R., G. Elsinga, L. Heijnen, B. B. Oude Munnink, C. M. E. Schapendonk, D.  
618 Nieuwenhuijse, M. Kon, L. Lu, F. M. Aarestrup, S. Lycett, G. Medema, M. P. G. Koopmans  
619 and M. de Graaf (2020). "Monitoring SARS-CoV-2 circulation and diversity through  
620 community wastewater sequencing." medRxiv: 2020.2009.2021.20198838.  
621 Jahn, K., Dreifuss, D., Topolsky, I., Kull, A., Ganesanandamoorthy, P., Fernandez-Cassi, X.  
622 Bänziger, C. Devaux, A.J., Stachler, E., Caduff, L., Cariti, F., Corzón, A. T., Fuhrmann, L.,  
623 Chen, C., Jablonski, K.P., Nadeau, S., Feldkamp, M., Beisel, C., Aquino, C., Stadler, T., Ort,  
624 C., Kohn, T., Julian, T.R., Beerenwinkel, N., (2021). Detection and surveillance of SARS-  
625 CoV-2 genomic variants in wastewater. <https://doi.org/10.1101/2021.01.08.21249379>  
626 Jones, D. L., M. Q. Baluja, D. W. Graham, A. Corbishley, J. E. McDonald, S. K. Malham, L.  
627 S. Hillary, T. R. Connor, W. H. Gaze, I. B. Moura, M. H. Wilcox and K. Farkas (2020).  
628 "Shedding of SARS-CoV-2 in feces and urine and its potential role in person-to-person  
629 transmission and the environment-based spread of COVID-19." Science of The Total  
630 Environment 749: 141364.  
631 Kantor, R. S., K. L. Nelson, H. D. Greenwald and L. C. Kennedy (2021). "Challenges in  
632 Measuring the Recovery of SARS-CoV-2 from Wastewater." Environ Sci Technol.  
633 Kim, D., J.-Y. Lee, J.-S. Yang, J. W. Kim, V. N. Kim and H. Chang (2020). "The Architecture  
634 of SARS-CoV-2 Transcriptome." Cell 181(4): 914-921.e910.  
635 Kirby AE, Walters MS, Jennings WC, Fugitt R, LaCross N, Mattioli M, Marsh ZA, Roberts VA,  
636 Mercante JW, Yoder J, Hill VR. (2021). Using Wastewater Surveillance Data to Support the  
637 COVID-19 Response - United States, 2020-2021. MMWR Morb Mortal Wkly Rep. 2021 Sep  
638 10;70(36):1242-1244. doi: 10.15585/mmwr.mm7036a2. PMID: 34499630; PMCID:  
639 PMC8437053.  
640 Launay, M.A., Dittmer, U., Steinmetz, H. (2016) Organic micropollutants discharged by  
641 combined sewer overflows - Characterisation of pollutant sources and stormwater-related  
642 processes. Water Research 104 (2016) 82-92

643 Li, X., Zhang, S., Shi,, J., Luby, S.P., Jiang, G., (2021). Uncertainties in estimating SARS-  
644 CoV-2 prevalence by wastewater-based epidemiology. *Chemical Engineering Journal* 415  
645 (2021) 129039

646 Liu, H., Q. Zhang, P. Wei, Z. Chen, K. Aviszus, J. Yang, W. Downing, S. Peterson, C. Jiang,  
647 B. Liang, L. Reynoso, G. P. Downey, S. K. Frankel, J. Kappler, P. Marrack and G. Zhang  
648 (2021). "The basis of a more contagious 501Y.V1 variant of SARS-COV-2." *bioRxiv*.

649 Lodder, W. and de Roda Husman A. M. (2020). "SARS-CoV-2 in wastewater: potential  
650 health risk, but also data source." *Lancet Gastroenterol Hepatol* 5(6): 533-534.

651 Medema, G., F. Been, L. Heijnen and S. Petterson (2020a) "Implementation of  
652 environmental surveillance for SARS-CoV-2 virus to support public health decisions:  
653 Opportunities and challenges." *Curr Opin Environ Sci Health* 17: 49-71.

654 Medema, G., L. Heijnen, G. Elsinga, R. Italiaander and A. Brouwer (2020b). "Presence of  
655 SARS-Coronavirus-2 RNA in Sewage and Correlation with Reported COVID-19 Prevalence  
656 in the Early Stage of the Epidemic in The Netherlands." *Environmental Science &*  
657 *Technology Letters* 7(7): 511-516.

658 Mulder, M. , van Voorthuizen, E., Langeveld, J. (2020). Verwijdering van organische  
659 microverontreinigingen. STOWA rapport 2020-06. (*in Dutch: Removal of organic*  
660 *micropollutants*)

661 NEN 6600 2019. Water – Sampling – Part 1: Wastewater

662 Ort,C. , Lawrence, M.G., Reungoat, J., Mueller, J.F. (2010). Sampling for PPCPs in  
663 wastewater systems: comparison of different sampling modes and optimization strategies,  
664 *Environ. Sci. Technol.* 44 (2010) 6289–6296.

665 Pekin, D., Y. Skhiri, J. C. Baret, D. Le Corre, L. Mazutis, C. B. Salem, F. Millot, A. El Harrak,  
666 J. B. Hutchison, J. W. Larson, D. R. Link, P. Laurent-Puig, A. D. Griffiths and V. Taly (2011).  
667 "Quantitative and sensitive detection of rare mutations using droplet-based microfluidics."  
668 *Lab Chip* 11(13): 2156-2166.

669 Prado, T., T. M. Fumian, C. F. Mannarino, P. C. Resende, F. C. Motta, A. L. F. Eppinghaus,  
670 V. H. Chagas do Vale, R. M. S. Braz, J. d. S. R. de Andrade, A. G. Maranhão and M. P.  
671 Miagostovich (2021). "Wastewater-based epidemiology as a useful tool to track SARS-CoV-2  
672 and support public health policies at municipal level in Brazil." *Water research* 191: 116810-  
673 116810.

674 Raaben, M., A. W. C. Einerhand, L. J. A. Taminiau, M. van Houdt, J. Bouma, R. H.  
675 Raatgeep, H. A. Büller, C. A. M. de Haan and J. W. A. Rossen (2007). "Cyclooxygenase  
676 activity is important for efficient replication of mouse hepatitis virus at an early stage of  
677 infection." *Virology journal* 4: 55-55.

678 Rios G, Lacoux C, Leclercq V, Diamant A, Lebrigand K, Lazuka A, Soyeux E, Lacroix S,  
679 Fassy J, Couesnon A, Thiery R, Mari B, Pradier C, Waldmann R, Barbry P. (2021).  
680 Monitoring SARS-CoV-2 variants alterations in Nice neighborhoods by wastewater nanopore  
681 sequencing. *Lancet Reg Health Eur.* 2021 Aug 17:100202. doi:  
682 10.1016/j.lanepe.2021.100202. Epub ahead of print. PMID: 34423327; PMCID:  
683 PMC8372489.

684 Rose, C., Parker, A., Jefferson, B., & Cartmell, E. (2015). The Characterization of Feces and  
685 Urine: A Review of the Literature to Inform Advanced Treatment Technology. *Critical reviews*  
686 *in environmental science and technology*, 45(17), 1827–1879.  
687 <https://doi.org/10.1080/10643389.2014.1000761>

688 Rothman JA, Loveless TB, Kaptcia J 3rd, Adams ED, Steele JA, Zimmer-Faust AG, Langlois  
689 K, Wanless D, Griffith M, Mao L, Chokry J, Griffith JF, Whiteson KL. (2021). RNA viromics of  
690 Southern California wastewater and detection of SARS-CoV-2 single nucleotide variants.  
691 *Appl Environ Microbiol.* 2021 Sep 22:AEM0144821. doi: 10.1128/AEM.01448-21. Epub  
692 ahead of print. PMID: 34550753.

693 Rynkiewicz, P., G. A. Babbitt, F. Cui, A. O. Hudson and M. L. Lynch (2021). "A comparative  
694 survey of Betacoronavirus binding dynamics relevant to the functional evolution of the highly  
695 transmissible SARS-CoV-2 variant N501Y." *bioRxiv*.

696 Schilperoort, R.P.S., Dirksen, J., Langeveld, J.G., Clemens, F.H.L.R. (2012). Assessing  
697 characteristic time and space scales of in-sewer processes by analysis of one year of  
698 continuous in-sewer monitoring data. *Water Science and Technology*, 66 (8), pp. 1614-1620.

699 Schang C., Crosbie N.D., Nolan M., Poon R., Wang M., Jex A., John N., Baker L., Scales P.,  
700 Schmidt J., Thorley B.R., Hill K., Zamyadi A., Tseng C.-W., Henry R., Kolotelo P., Langeveld  
701 J., Schilperoort R., Shi B., Einsiedel S., Thomas M., Black J., Wilson S., McCarthy D.T.  
702 (2021). Passive Sampling of SARS-CoV-2 for Wastewater Surveillance. *Environmental*  
703 *Science and Technology* 55 (15). 10432-10441

704 Shkoporov A. N. Clooney, A.G., Sutton, T.D.S., Ryan, F.J., Daly, K.M., Nolan, J.A.,  
705 McDonnell, S.A., Khokhlova, E.V., Draper, L.A., Forde, A., Guerin, E., Velayudhan, V.,  
706 Ross, R.P., Hill, C. (2019). The Human Gut Virome Is Highly Diverse, Stable, and Individual  
707 Specific. *Cell Host & Microbe* 26, 527–541. <https://doi.org/10.1016/j.chom.2019.09.009>

708 Siranosian, B.A., Tamburini, F.B., Sherlock, G. et al. Acquisition, transmission and strain  
709 diversity of human gut-colonizing crAss-like phages. *Nat Commun* 11, 280 (2020).  
710 <https://doi.org/10.1038/s41467-019-14103-3>

711 Stachler, E., C. Kelty, M. Sivaganesan, X. Li, K. Bibby and O. C. Shanks (2017).  
712 "Quantitative CrAssphage PCR Assays for Human Fecal Pollution Measurement." *Environ*  
713 *Sci Technol* 51(16): 9146-9154.

714 Sweetapple C, Melville-Shreeve P, Chen AS, Grimsley JMS, Bunce JT, Gaze W, Fielding S,  
715 Wade MJ. Building knowledge of university campus population dynamics to enhance near-to-  
716 source sewage surveillance for SARS-CoV-2 detection. *Sci Total Environ*. 2021 Sep  
717 20;806(Pt 1):150406. doi: 10.1016/j.scitotenv.2021.150406. Epub ahead of print. PMID:  
718 34571237; PMCID: PMC8450208.

719 Taboada B, Morán P, Serrano-Vázquez A, Iša P, Rojas-Velázquez L, et al. (2021) The gut  
720 virome of healthy children during the first year of life is diverse and dynamic. *PLOS ONE*  
721 16(4): e0240958. <https://doi.org/10.1371/journal.pone.0240958>

722 Tandukar, S., Sherchan, S., P., &Haramoto, E. (2020) Applicability of crAssphage, pepper  
723 mild mottle virus, and tobacco mosaic virus as indicators of reduction of enteric viruses  
724 during wastewater treatment. [www.nature.com/scientificreports](http://www.nature.com/scientificreports). 10:3616 |  
725 <https://doi.org/10.1038/s41598-020-60547-9>

726 Tegally, H., E. Wilkinson, M. Giovanetti, A. Iranzadeh, V. Fonseca, J. Giandhari, D. Doolabh,  
727 S. Pillay, E. J. San, N. Msomi, K. Mlisana, A. von Gottberg, S. Walaza, M. Allam, A. Ismail, T.  
728 Mohale, A. J. Glass, S. Engelbrecht, G. Van Zyl, W. Preiser, F. Petruccione, A. Sigal, D.  
729 Hardie, G. Marais, M. Hsiao, S. Korsman, M. A. Davies, L. Tyers, I. Mudau, D. York, C.  
730 Maslo, D. Goedhals, S. Abrahams, O. Laguda-Akingba, A. Alisoltani-Dehkordi, A. Godzik, C.  
731 K. Wibmer, B. T. Sewell, J. Lourenço, L. C. J. Alcantara, S. L. Kosakovsky Pond, S. Weaver,  
732 D. Martin, R. J. Lessells, J. N. Bhiman, C. Williamson and T. de Oliveira (2021). "Emergence  
733 of a SARS-CoV-2 variant of concern with mutations in spike glycoprotein." *Nature*.  
734 US-CDC (2020). "2019-Novel Coronavirus (2019-nCoV) Real-Time rRT-PCR Panel Primers  
735 and Probes." <https://www.cdc.gov/coronavirus/2019-ncov/lab/rt-pcr-panel-primer-probes.html>  
736 (accessed May 19, 2020).

737 Volz, E., S. Mishra, M. Chand, J. C. Barrett, R. Johnson, L. Geidelberg, W. R. Hinsley, D. J.  
738 Laydon, G. Dabrera, Á. O'Toole, R. Amato, M. Ragonnet-Cronin, I. Harrison, B. Jackson, C.  
739 V. Ariani, O. Boyd, N. J. Loman, J. T. McCrone, S. Gonçalves, D. Jorgensen, R. Myers, V.  
740 Hill, D. K. Jackson, K. Gaythorpe, N. Groves, J. Sillitoe, D. P. Kwiatkowski, S. Flaxman, O.  
741 Ratmann, S. Bhatt, S. Hopkins, A. Gandy, A. Rambaut and N. M. Ferguson (2021).  
742 "Transmission of SARS-CoV-2 Lineage B.1.1.7 in England: Insights from linking  
743 epidemiological and genetic data." medRxiv: 2020.2012.2030.20249034.

744 Vosse, M. (2013). Rioolvreemd water rioolwaterzuiveringsinrichting Dokhaven. Technical  
745 report of RoyalHaskoningDHV (in Dutch).

746 Wang, D., B. Hu, C. Hu, F. Zhu, X. Liu, J. Zhang, B. Wang, H. Xiang, Z. Cheng, Y. Xiong, Y.  
747 Zhao, Y. Li, X. Wang and Z. Peng (2020). "Clinical Characteristics of 138 Hospitalized  
748 Patients With 2019 Novel Coronavirus–Infected Pneumonia in Wuhan, China." *JAMA*  
749 323(11): 1061-1069.



750 Wang, P., L. Liu, S. Iketani, Y. Luo, Y. Guo, M. Wang, J. Yu, B. Zhang, P. D. Kwong, B. S.  
751 Graham, J. R. Mascola, J. Y. Chang, M. T. Yin, M. Sobieszczyk, C. A. Kyratsous, L. Shapiro,  
752 Z. Sheng, M. S. Nair, Y. Huang and D. D. Ho (2021). "Increased Resistance of SARS-CoV-2  
753 Variants B.1.351 and B.1.1.7 to Antibody Neutralization." bioRxiv.  
754 Weiß, G., Brombach, H., and Haller, B., (2002). Infiltration and inflow in combined sewer  
755 systems: long-term analysis. *Water Science & Technology* 45 (7) 11-19  
756 Wilder, M.L., Middleton, F., Larsen, D.A., Du Q., Fenty A., Zeng, T., Insaf, T., Kilaru, P.,  
757 Collins M., Kmush, B., Green, H.C., (2020). Co-quantification of crAssphage increases  
758 confidence in wastewater-based epidemiology for SARS-CoV-2 in low prevalence areas.  
759 *Water Research X* 11 (2021) 100100  
760 Wolfe MK, Topol A, Knudson A, Simpson A, White B, Vugia DJ, Yu AT, Li L, Balliet M,  
761 Stoddard P, Han GS, Wigginton KR, Boehm AB. High-Frequency, High-Throughput  
762 Quantification of SARS-CoV-2 RNA in Wastewater Settled Solids at Eight Publicly Owned  
763 Treatment Works in Northern California Shows Strong Association with COVID-19 Incidence.  
764 *mSystems*. 2021 Oct 26;6(5):e0082921. doi: 10.1128/mSystems.00829-21. Epub 2021 Sep  
765 14. PMID: 34519528; PMCID: PMC8547422.  
766 Wölfel, R., V. M. Corman, W. Guggemos, M. Seilmaier, S. Zange, M. A. Müller, D. Niemeyer,  
767 T. C. Jones, P. Vollmar, C. Rothe, M. Hoelscher, T. Bleicker, S. Brünink, J. Schneider, R.  
768 Ehmann, K. Zwirgmaier, C. Drosten and C. Wendtner (2020). "Virological assessment of  
769 hospitalized patients with COVID-2019." *Nature* 581(7809): 465-469.  
770 Wu, F., Xiao, A., Zhang, J., Moniz, K., Endo, N., Armas, F., Bushman, M., Chai, P.R.  
771 Duvallet, C., Erickson, T.B., Foppe, K., Ghaeli, N., Gu, X., Hanage, W.P., Huang, K.H., Lin,  
772 W., Lee, Matus, M., McElroy, K.E., Rhode, S.F., Wuertz, S., Thompson, J., Alm, E.J., (2021)  
773 Wastewater Surveillance of 1 SARS-CoV-2 across 40 U.S. states. medRxiv preprint doi:  
774 <https://doi.org/10.1101/2021.03.10.21253235>  
775 Xiao, F., M. Tang, X. Zheng, Y. Liu, X. Li and H. Shan (2020). "Evidence for Gastrointestinal  
776 Infection of SARS-CoV-2." *Gastroenterology* 158(6): 1831-1833

777 Yaniv K, Shagan M, Lewis YE, Kramarsky-Winter E, Weil M, Indenbaum V, Elul M, Erster O,  
778 Brown AS, Mendelson E, Mannasse B, Shirazi R, Lakkakula S, Miron O, Rinott E, Baibich  
779 RG, Bigler I, Malul M, Rishti R, Brenner A, Friedler E, Gilboa Y, Sabach S, Alfiya Y, Cheruti  
780 U, Nadav Davidovich, Moran-Gilad J, Berchenko Y, Bar-Or I, Kushmaro A. (2021). City-level  
781 SARS-CoV-2 sewage surveillance. *Chemosphere*. 2021 Nov;283:131194. doi:  
782 10.1016/j.chemosphere.2021.131194.  
783



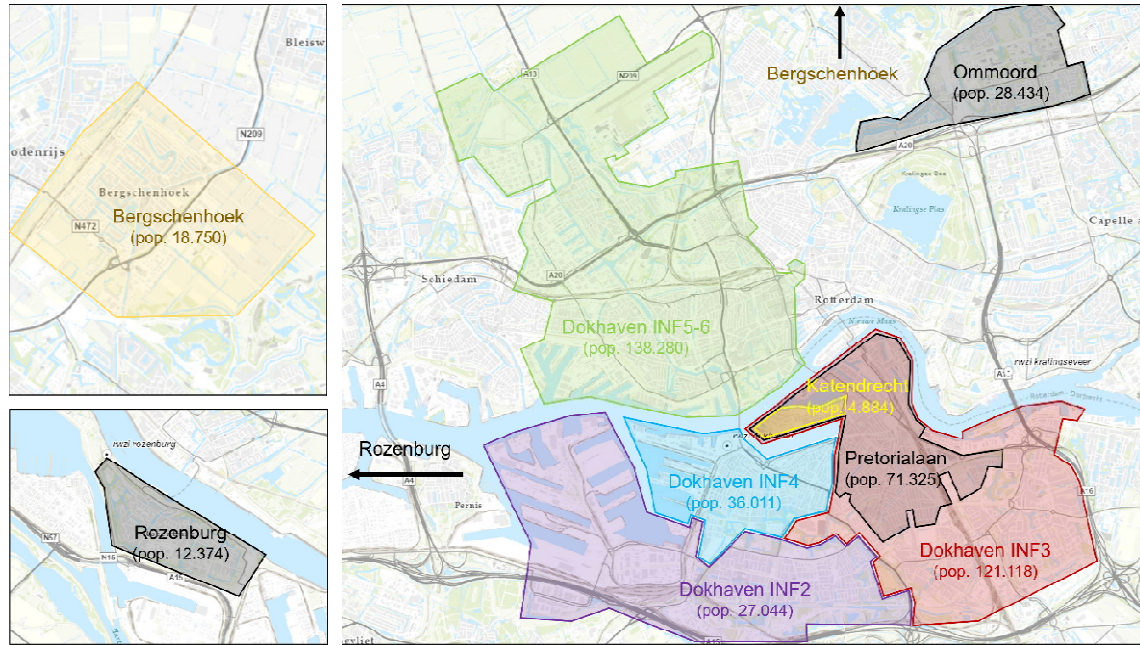

Figure 1. Catchment areas in the Rotterdam Rijnmond area used for wastewater surveillance with their population size.

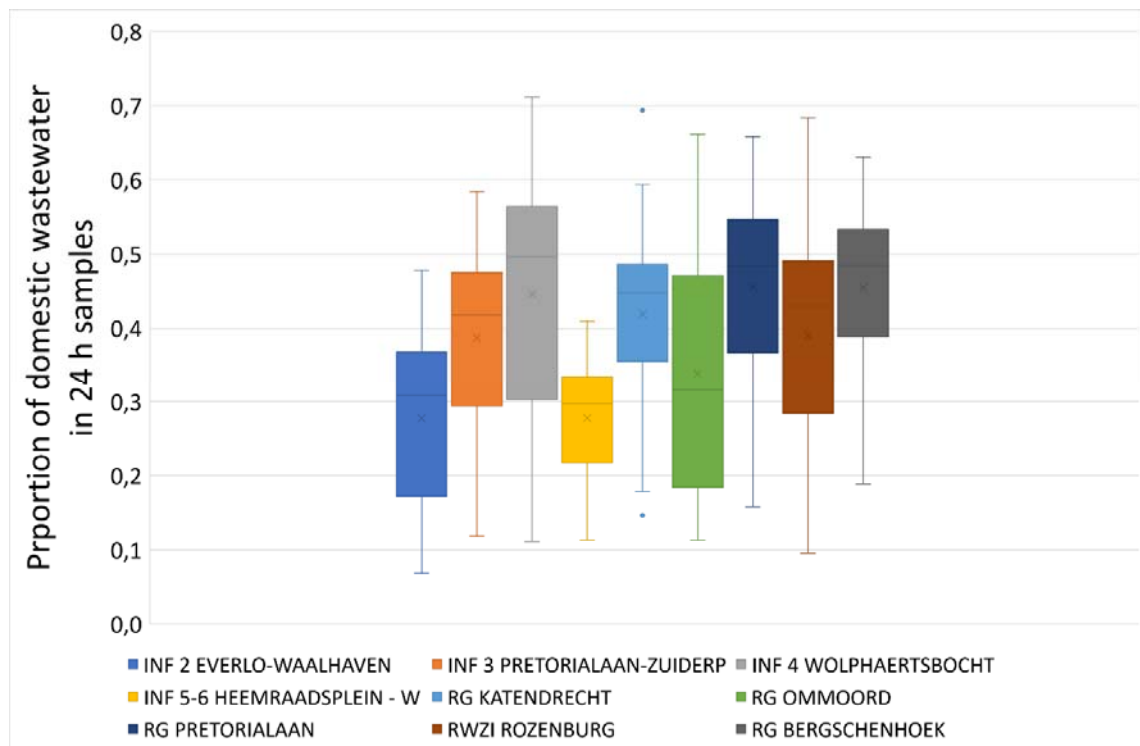

Figure 2. Boxplot with proportion of domestic wastewater in 24h samples. Proportion of domestic wastewater is calculated per sample by dividing the theoretical domestic wastewater production ( $\#$  inhabitants from figure 1 \* 120 lpppd) by the measured 24 flow.

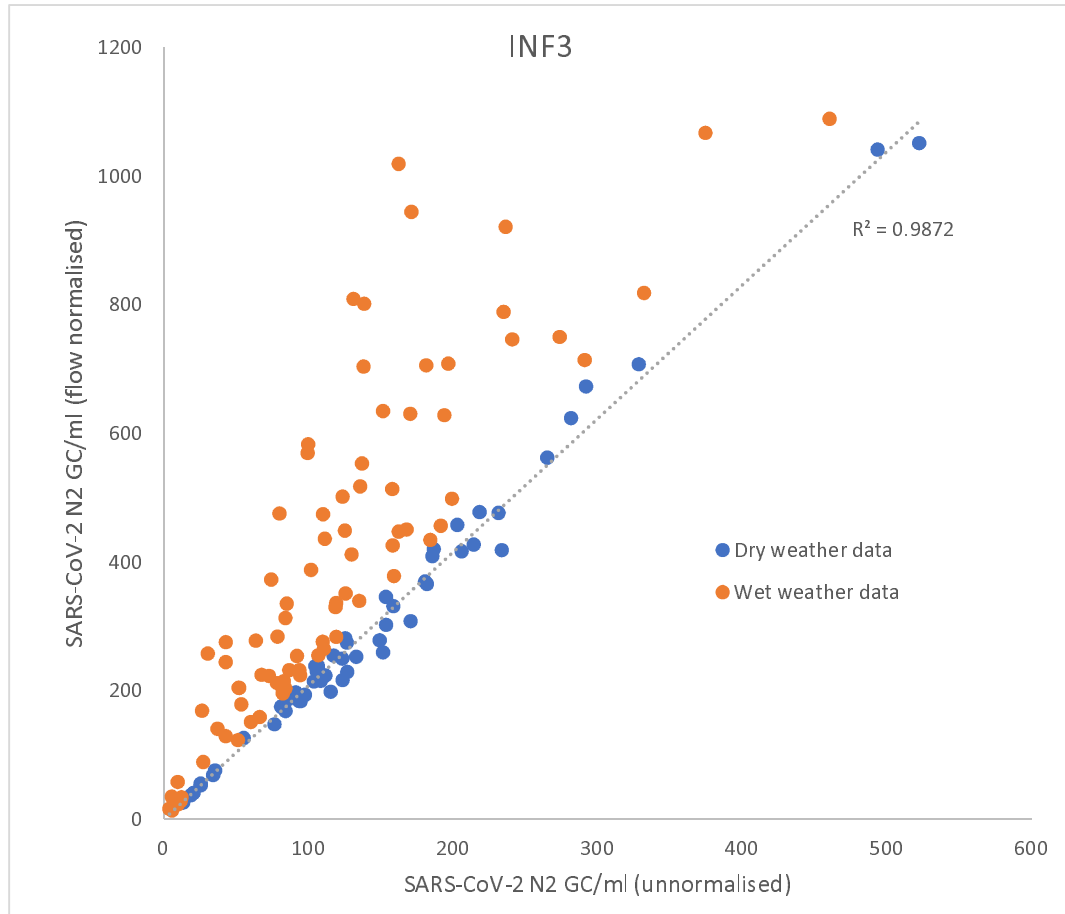

Figure 3. Flow normalised versus unnormalised SARS-CoV-2 concentrations at site INF3 during dry weather and wet weather. The trendline for the dry weather data (flow  $< V_{dwf\ ref}$ ) shows a high correlation between normalized and unnormalised data, but this is lost in the wet weather data.

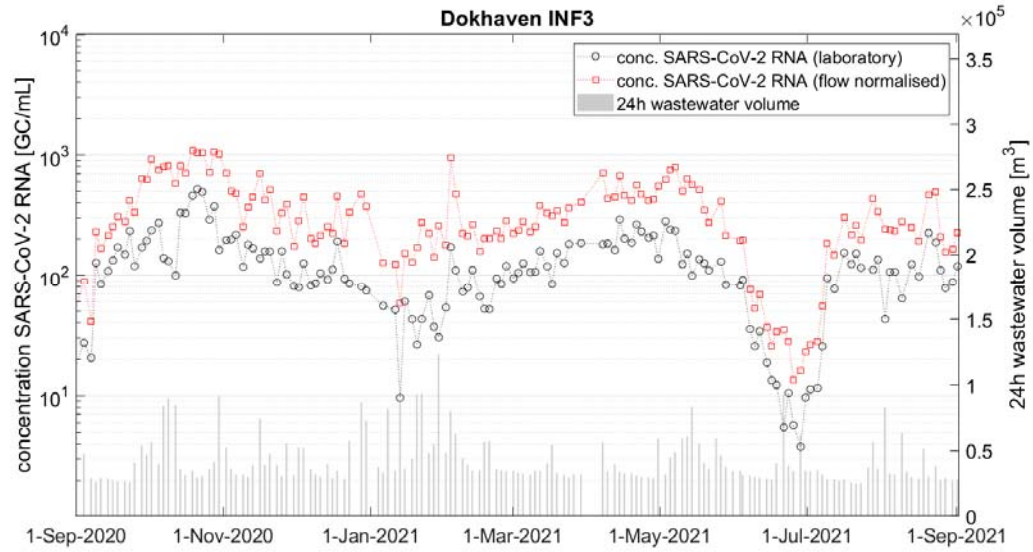

Figure 4. Flow normalised vs unnormalised for catchment INF3

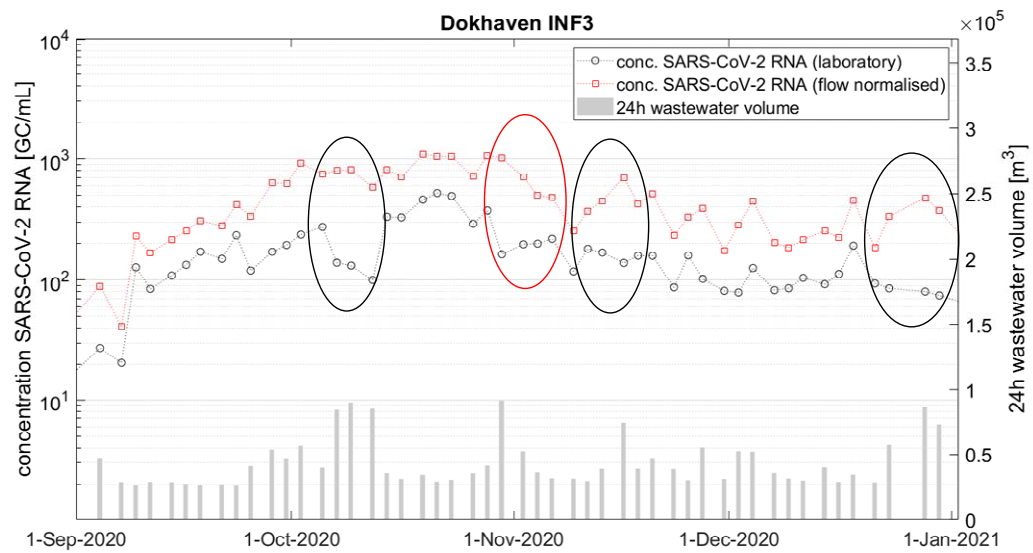

Figure 5. Short-term trends normalised vs unnormalised for catchment INF3. Weeks with a differing trend are indicated

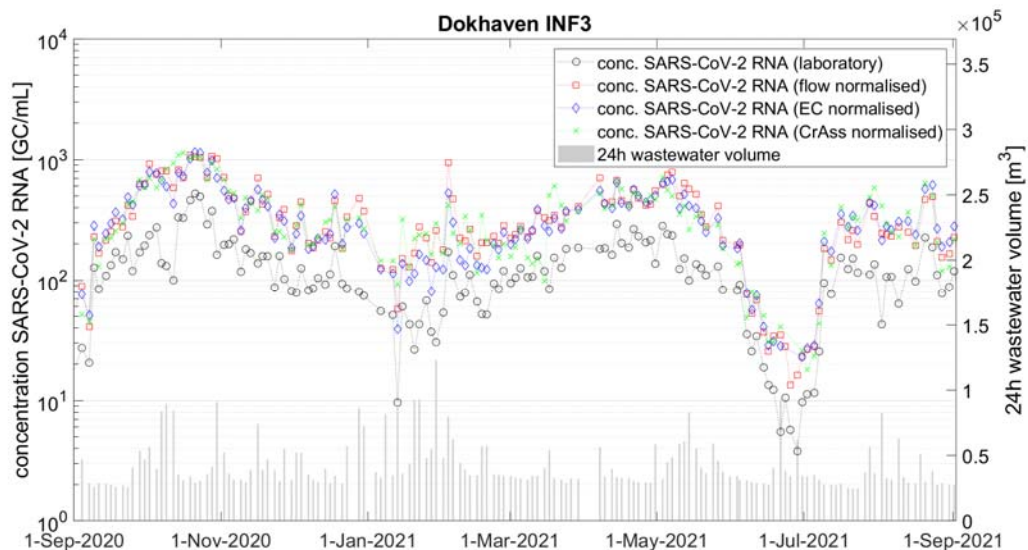

Figure 6. SARS-CoV-2 trends in INF3 catchment. On left axis lab results, flow normalised, CrAss normalised and EC normalised, on right axis the daily flow volume.

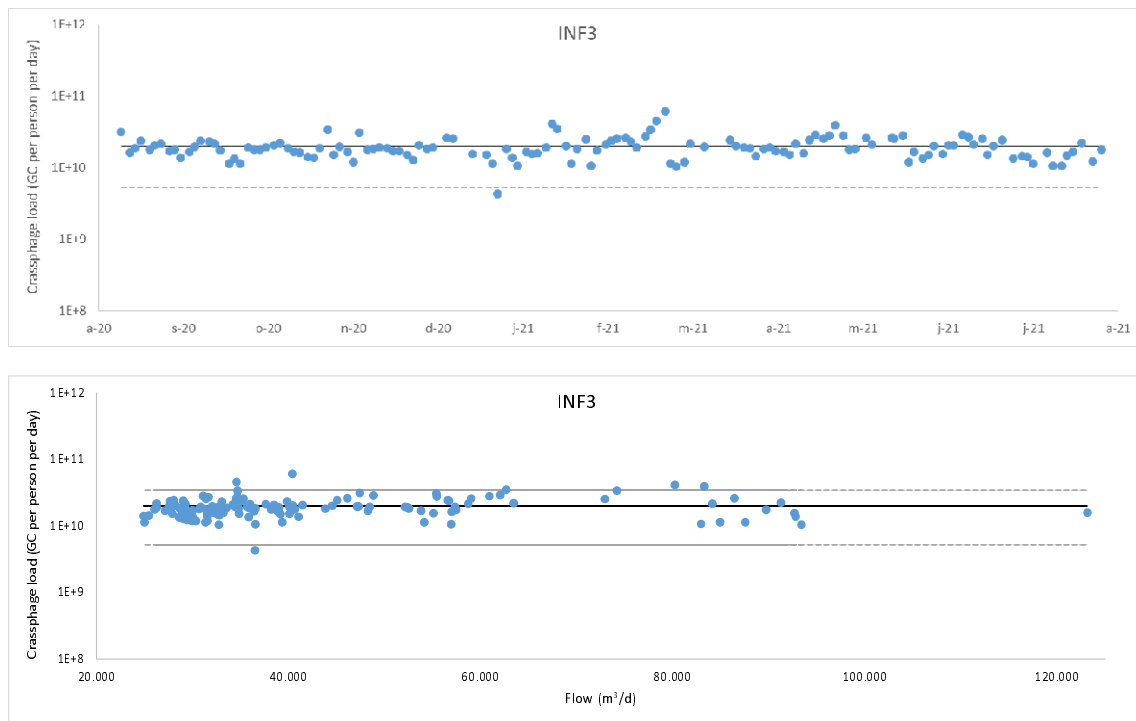

Figure 7. CrAssphage daily load per person in INF3 catchment related to time (top) and related to daily flow (bottom). The solid lines shows the average ( $2.0 \cdot 10^{10}$  GC/ml) and the dotted lines are the 2s boundaries ( $5.2 \cdot 10^9 - 3.4 \cdot 10^{10}$  GC/ml).

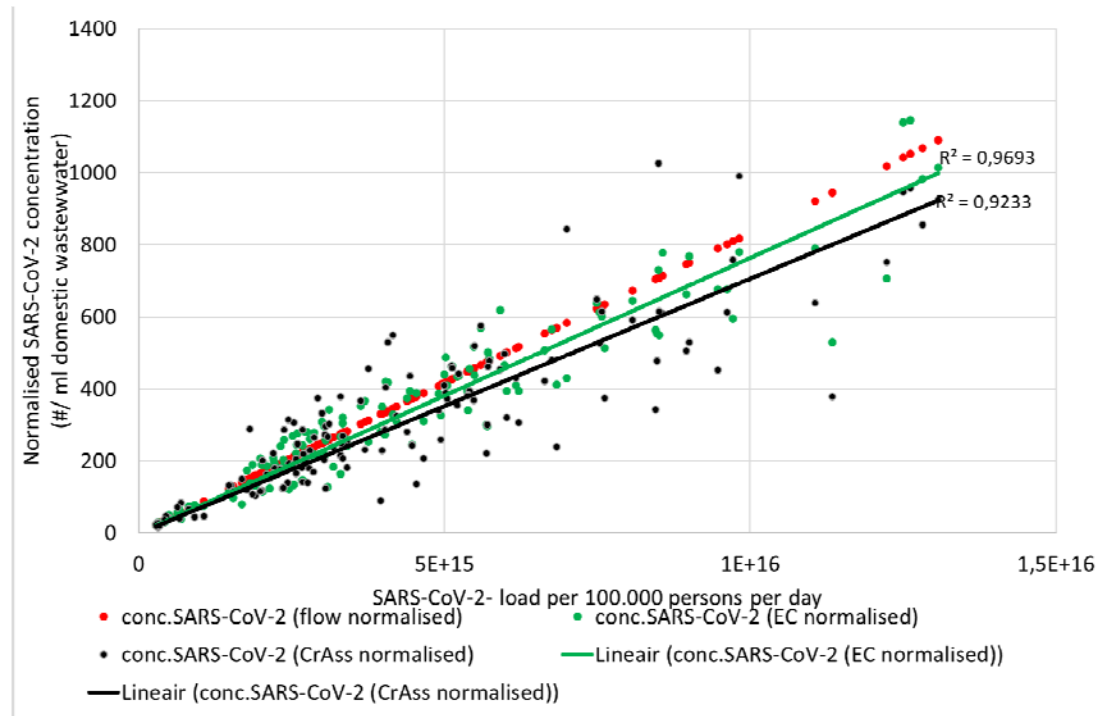

Figure 8. Correlation between daily SARS-CoV-2 load per 100.000 inhabitants and flow based, EC based and CrAss based normalisation for INF3 catchment

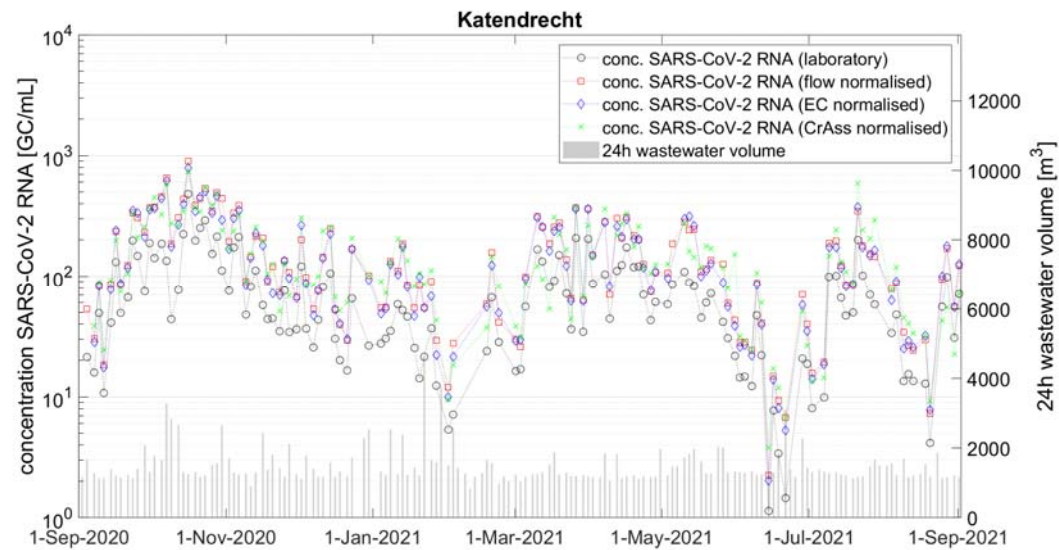

Figure 9. Normalisation of SARS-CoV-2 at the Katendrecht catchment



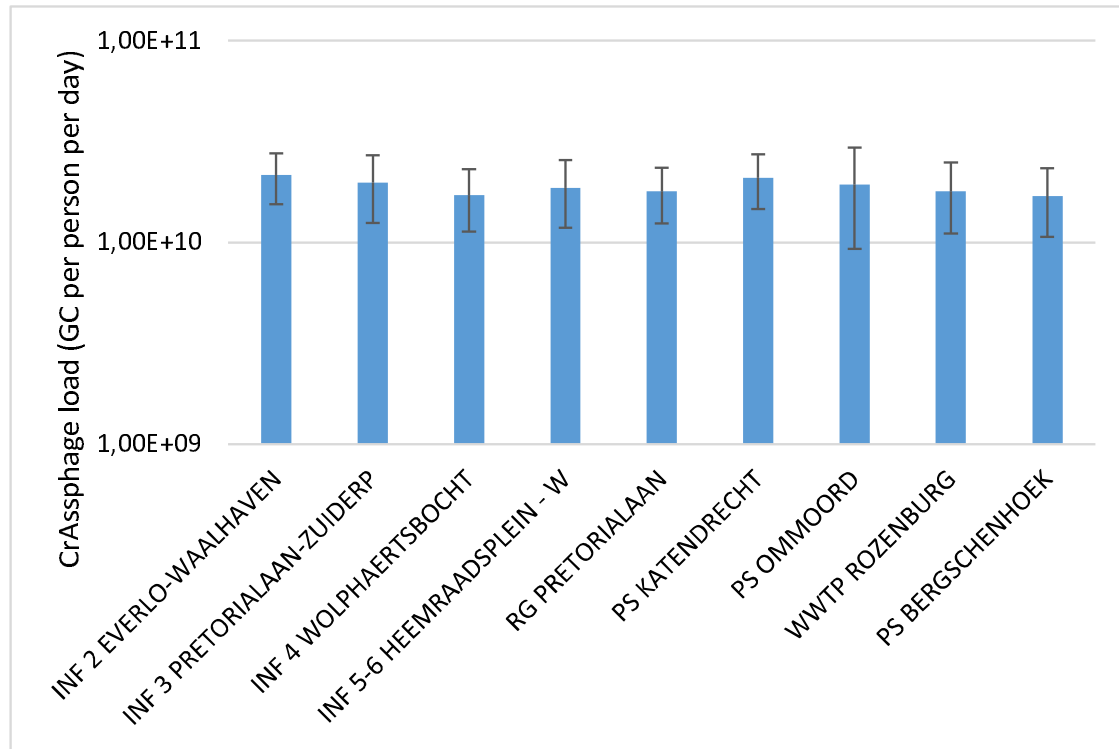

Figure 10. Average CrAssphage load per person per day in the different city areas. Error bars show the standard deviation.

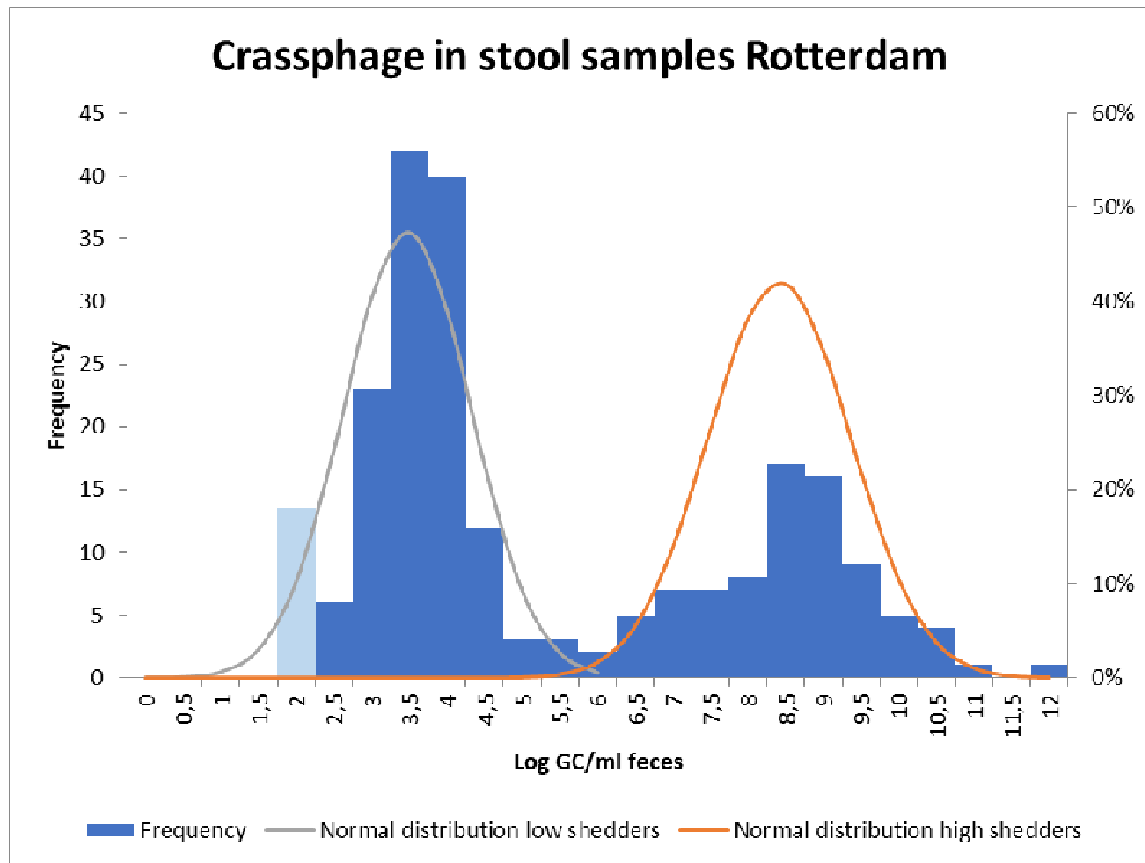

Figure 11. Distribution of CrAssphage GC/ml in human stool samples (n=221) from Rotterdam. Frequency of data below the detection limit (140 GC/ml) is shown in light blue. Normal distribution fitted through the log-transformed concentrations in stool samples of the low shedder ( $<10^{6.5}$  GC/ml; mean: 3.474; standard deviation 0.843; in grey) and the high shedder ( $\geq 10^{6.5}$  GC/ml; mean: 8.413; standard deviation 0.950; in orange).
